# Supplementary material for: Synthesis, characterization, in vitro and computational assessment of new xanthene hydrazone derivatives as promising vasorelaxant agents
Source: Royal Society of Chemistry journal article supplement (doi:10.1039/d6ra01067a), 2026-04-17
Supplement: d6ra01067a1.pdf [file d6ra01067a1.pdf]

## Synthesis, Characterization, *in vitro* and Computational Assessment of New Xanthene Hydrazone Derivatives as Promising Vasorelaxant Agents

Mohammed El Mesky<sup>1\*</sup>, Ismail bouadid<sup>2</sup>, Fatimazahra Guerguer<sup>3</sup>, Zgueni Hicham<sup>1</sup>, Yassine Rhazi<sup>4</sup>, Mohammed Chalkha<sup>1,4\*</sup>, Farid Khallouki<sup>2</sup>, Samir Chtita<sup>3</sup>, Sahar Abdulaziz AlSedairy<sup>5</sup>, Mourad A. M. Aboul-Soud<sup>6\*</sup>, John P. Giesy<sup>7,8,9</sup>, Driss Chebabe<sup>1</sup>, El Houssine Mabrouk<sup>1,4</sup> and Mohamed Eddouks<sup>2</sup>

<sup>1</sup>Laboratory of Materials Engineering for the Environment and Natural Resources, Faculty of Sciences and Techniques, University of Moulay Ismail of Meknès, B.P 509, Boutalamine, 52000, Errachidia, Morocco.

<sup>2</sup>Team of Ethnopharmacology and Pharmacognosy, Faculty of Sciences and Techniques Errachidia, Moulay Ismail University of Meknes, Errachidia, Morocco

<sup>3</sup>Laboratory of Analytical and Molecular Chemistry, Faculty of Sciences Ben M'Sik, Hassan II University of Casablanca, Casablanca, Morocco

<sup>4</sup>Laboratory of Engineering of Organometallic, Molecular Materials, Environment, and Innovative Pedagogy (LIMOMEPI), Faculty of Sciences Dhar EL Mahraz, Sidi Mohamed Ben Abdellah University, P.O. Box 1796 (Atlas), 30000 Fez, Morocco.

<sup>5</sup> Department of Food Sciences and Nutrition, College of Food and Agricultural Sciences, King Saud University, P.O.Box 2460, Riyadh 11451, Saudi Arabia;

<sup>6</sup>Center of Excellence in Biotechnology Research (CEBR), College of Applied Medical Sciences, King Saud University, P.O. Box 17 10219, Riyadh 11433, Saudi Arabia;

<sup>7</sup>Department of Veterinary Biomedical Sciences and Toxicology Centre, Western College of Veterinary Medicine, University of Saskatchewan, Saskatoon, SK S7N 5B4, Canada, Jgiesy@aol.com

<sup>8</sup>Department of Integrative Biology and Center for Integrative Toxicology, Michigan State University, East Lansing, MI 48824, USA

<sup>9</sup>Department of Environmental Sciences, Baylor University, Waco, 76706, USA,

**\*Corresponding authors' E-mails:** [m.elmesky@edu.umi.ac.ma](mailto:m.elmesky@edu.umi.ac.ma); [mohammed.chalkha1@usmba.ac.ma](mailto:mohammed.chalkha1@usmba.ac.ma); [maboulsoud@ksu.edu.sa](mailto:maboulsoud@ksu.edu.sa)

***I. Chemical reagents and instruments***

All chemicals, solvents and reagents used were of analytical grade and used without further purification. The chemicals were purchased from commercial suppliers: Fluorescein(98.0 %), hydrazine (99.0 %), Ethanol ( $\geq 99.5$  %), (99.8%), 4-methoxybenzaldehyde (98.0 %), Benzaldehyde (98.0 %), 4-nitrobenzaldehyde (98.0 %), Ethyl bromoacetate (99.8%), Dimethylformamide (99.8 %), Potassium carbonate ( $\geq 98.0$  %), Tetrabutylammonium bromide ( $\geq 98.0$  %), Hexane ( $\geq 95$ %), Acetate d'ethyle ( $\geq 98\%$ ).

## II. NMR $^1\text{H}$ Spectra of FH, F1-F7

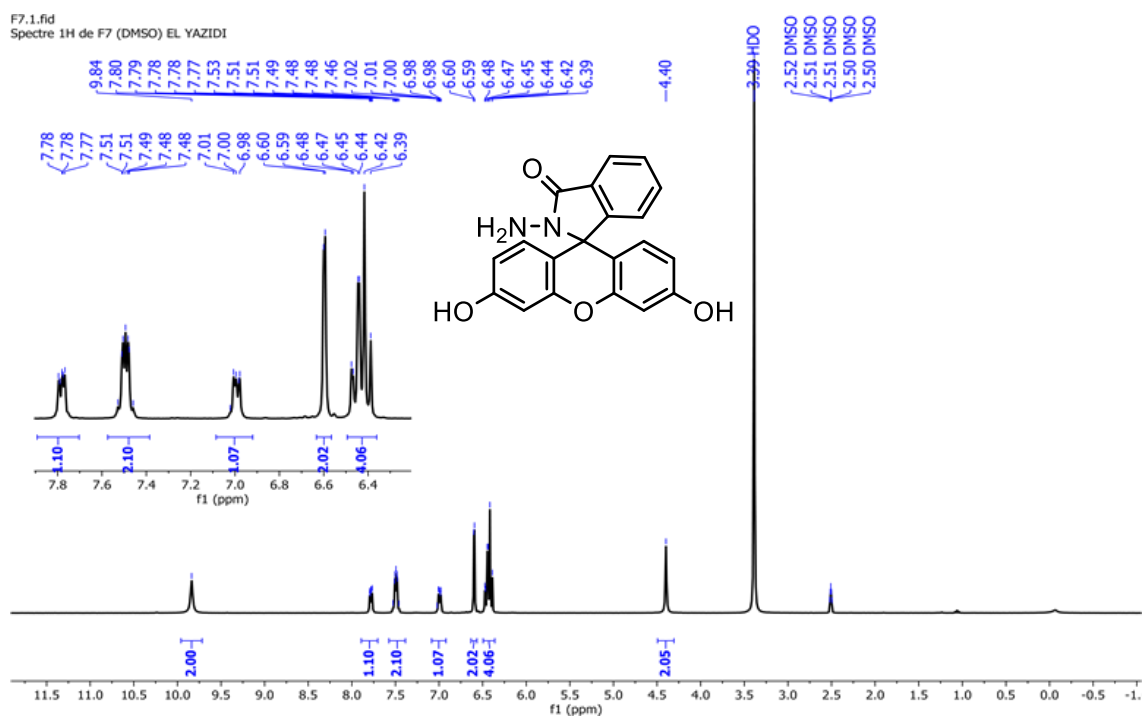

Figure S 1.  $^1\text{H}$  NMR spectrum (300 MHz, DMSO- $d_6$ ) of FH

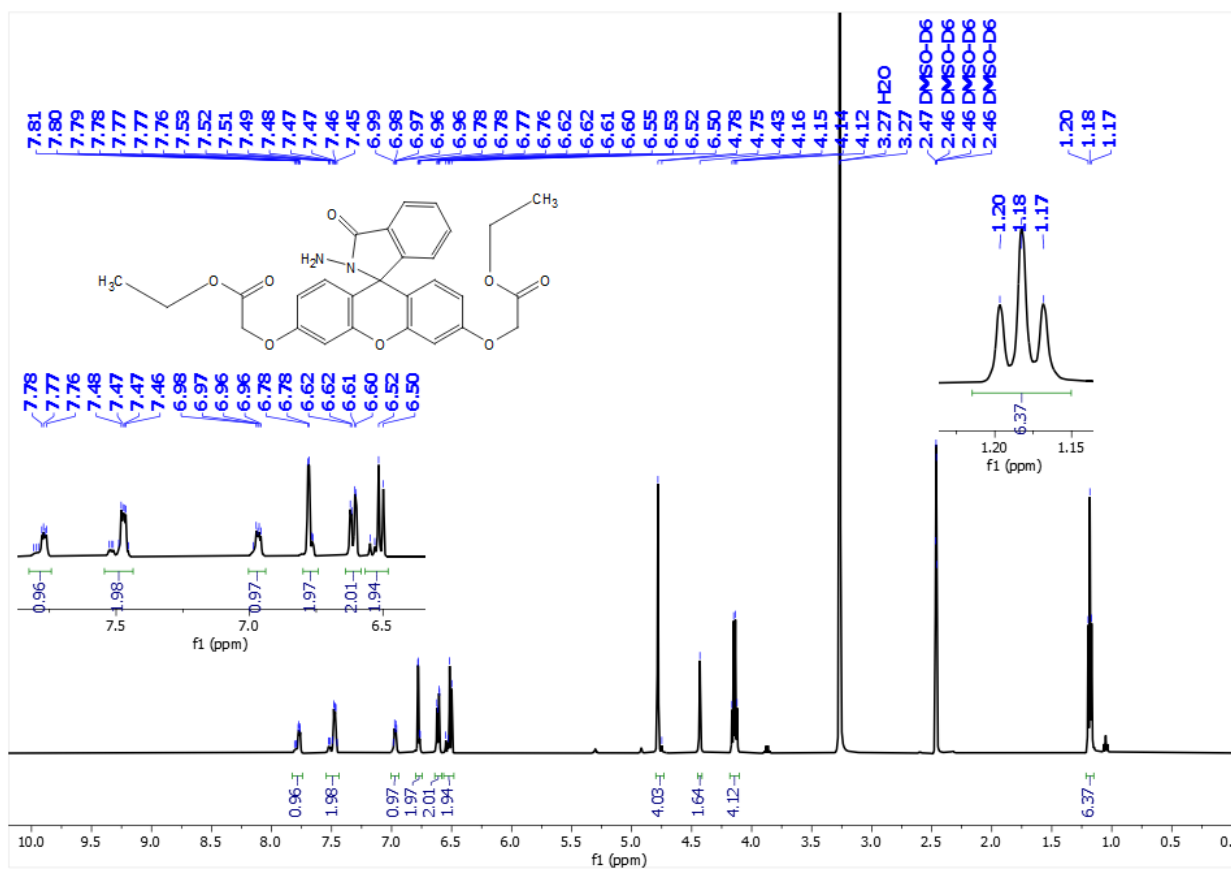

Figure S 2.  $^1\text{H}$  NMR spectrum (500 MHz, DMSO- $d_6$ ) of F1

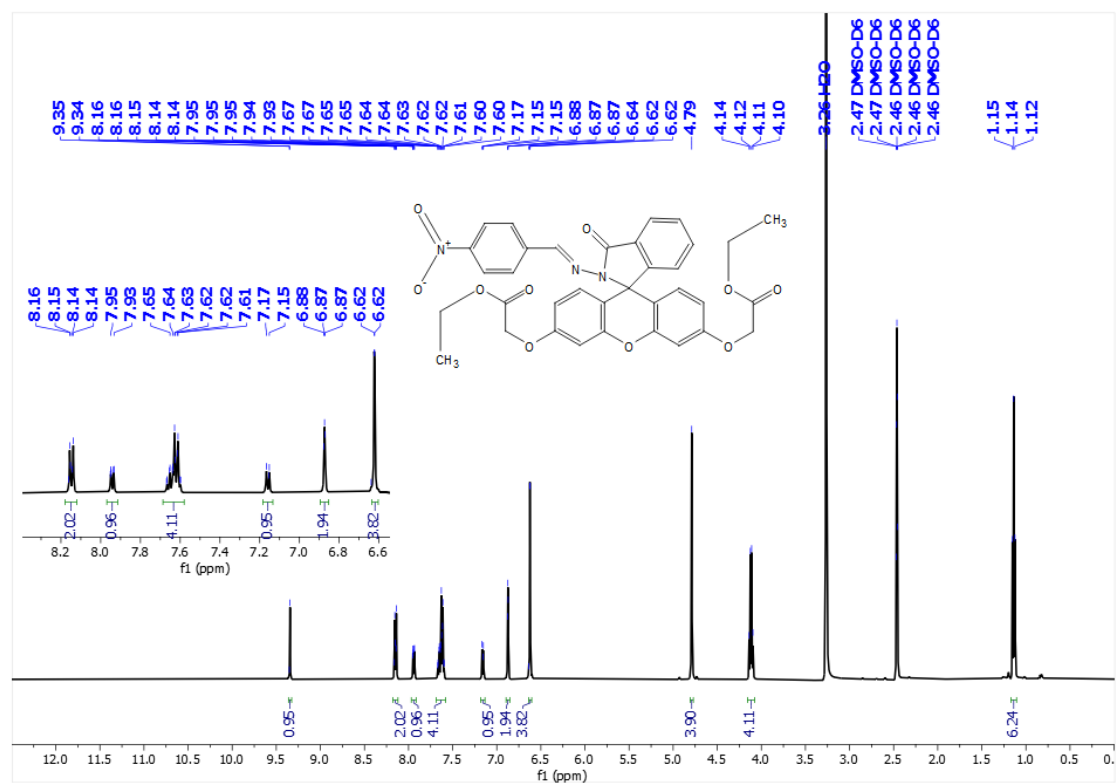

**Figure S 3. <sup>1</sup>H NMR spectrum (500 MHz, DMSO-d<sub>6</sub>) of F2**

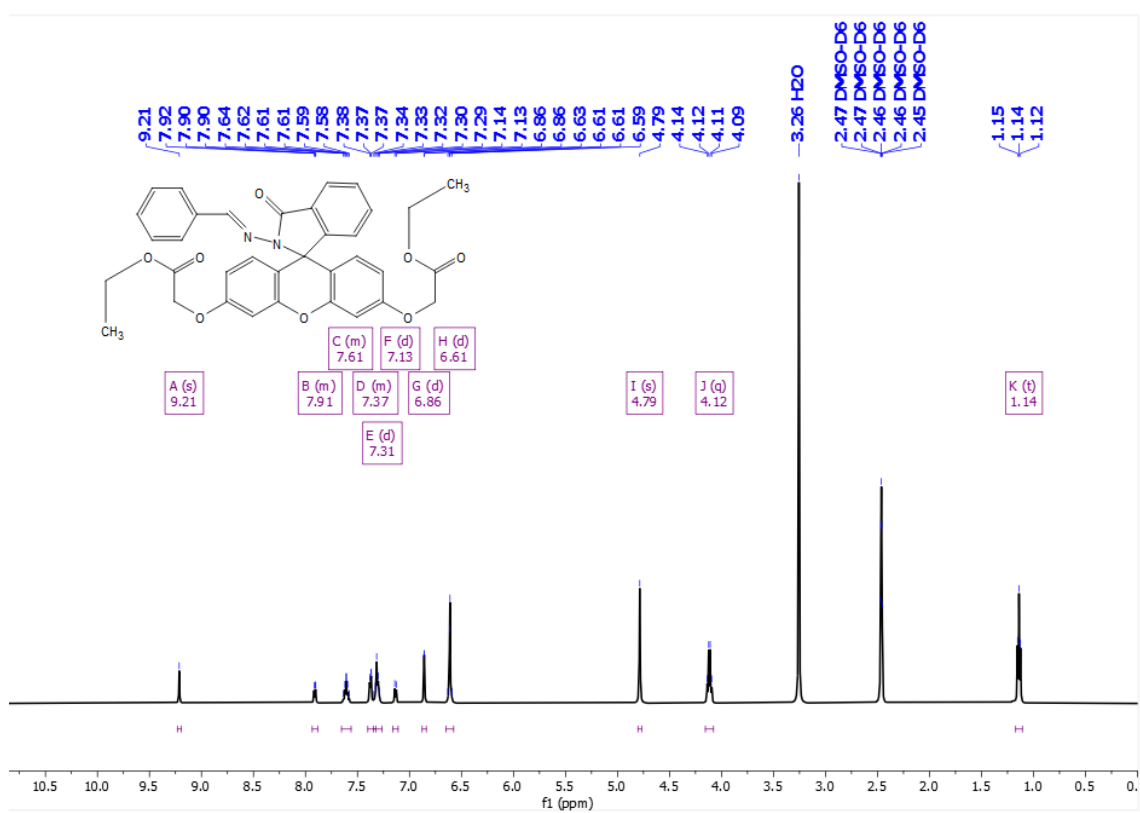

**Figure S 4. <sup>1</sup>H NMR spectrum (500 MHz, DMSO-d<sub>6</sub>) of F3**

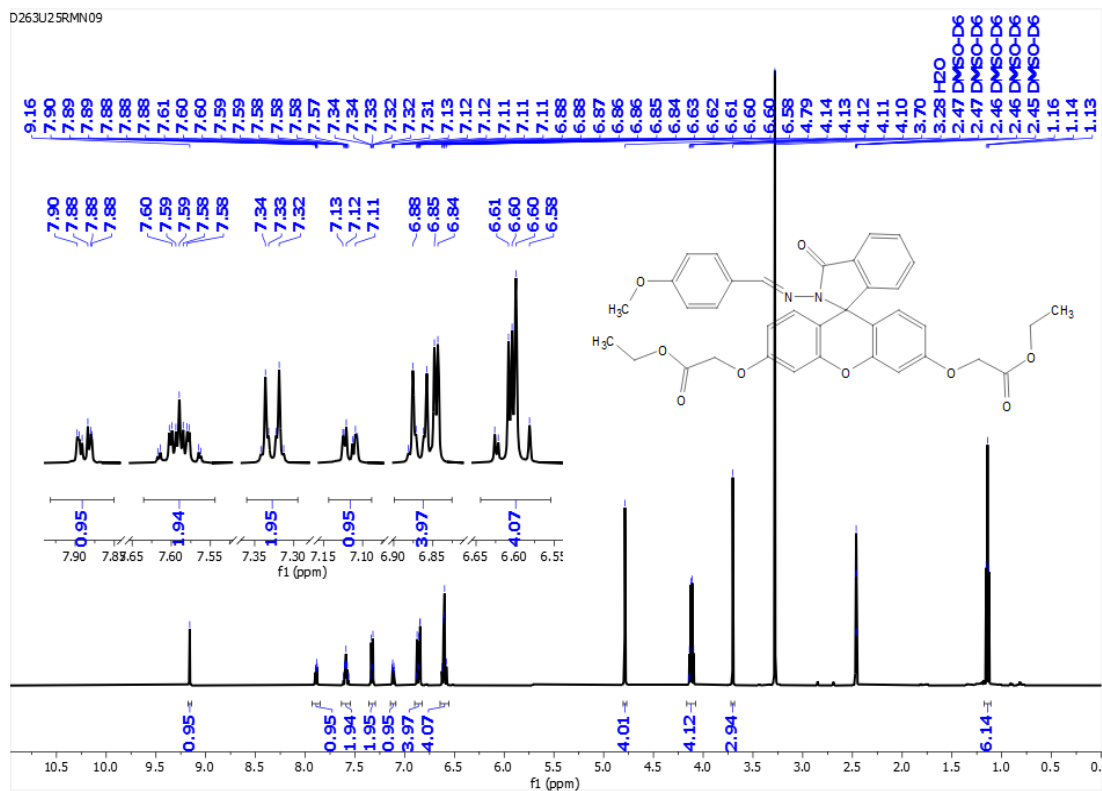Figure S 5. <sup>1</sup>H NMR spectrum (500 MHz, DMSO-d<sub>6</sub>) of F4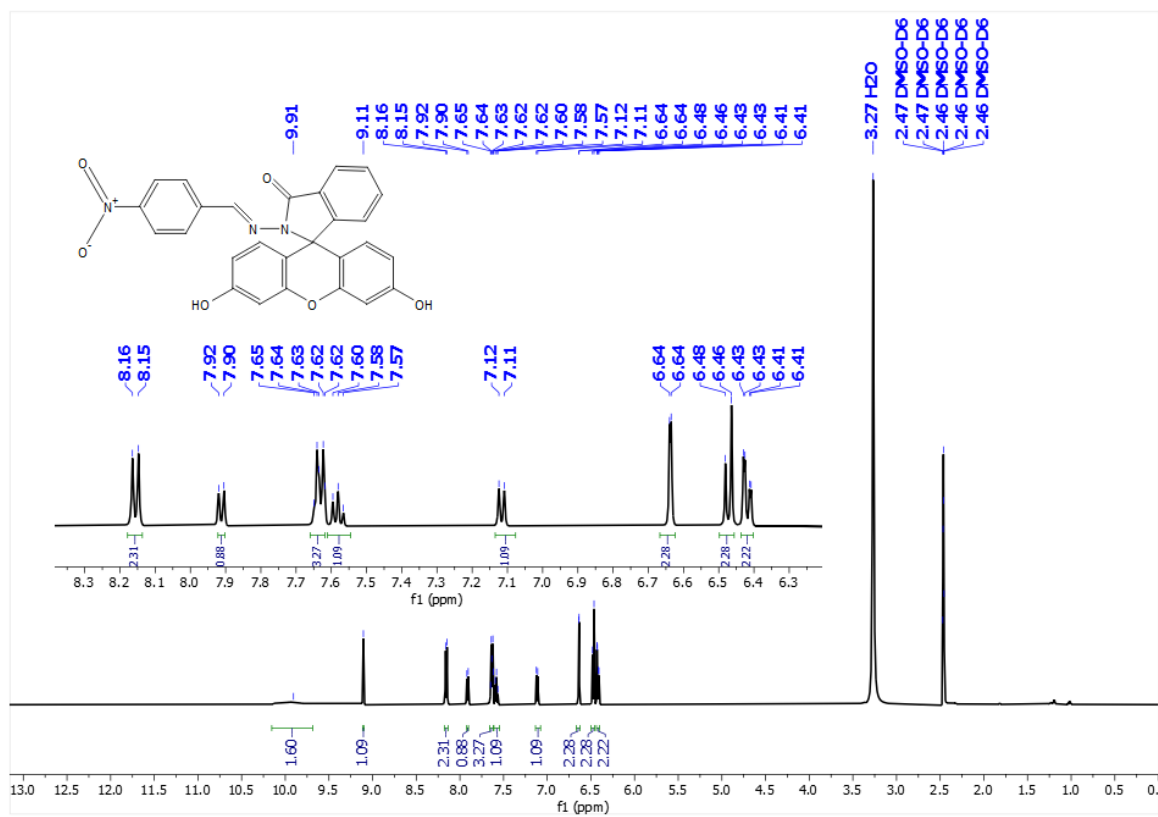Figure S 6. <sup>1</sup>H NMR spectrum (500 MHz, DMSO-d<sub>6</sub>) of F5

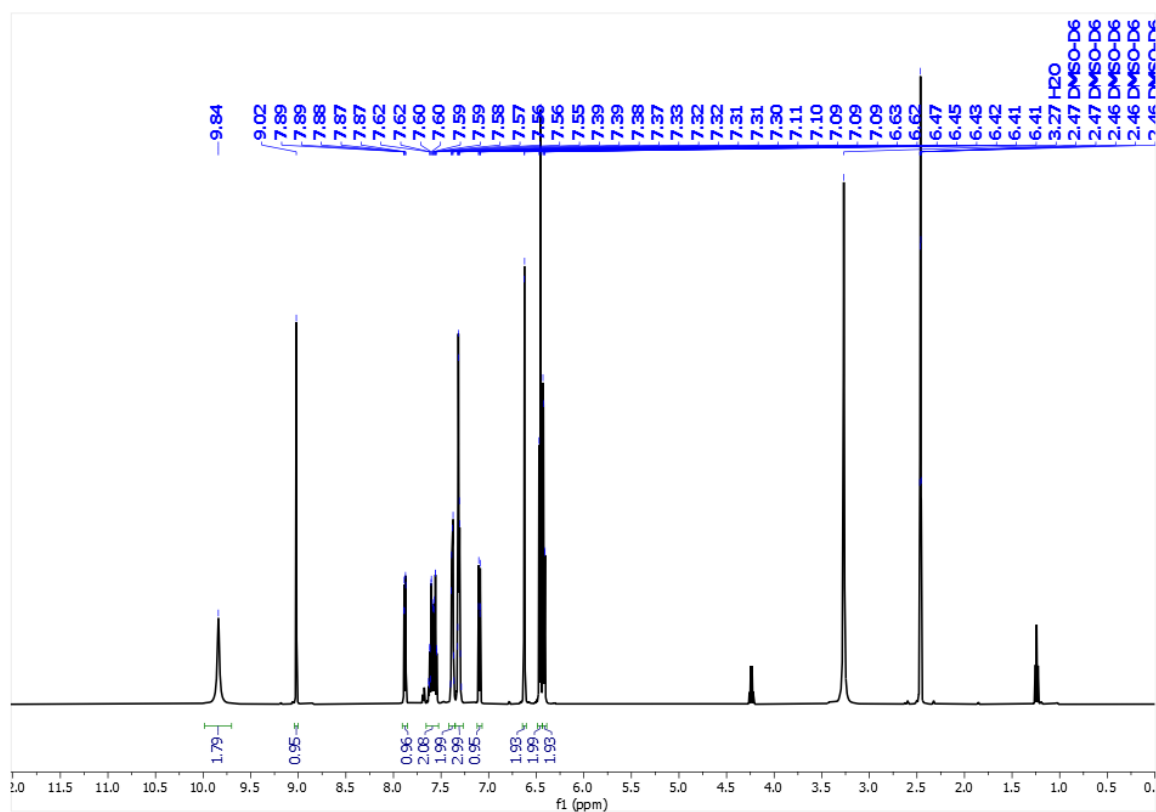Figure S 7.  $^1\text{H}$  NMR spectrum (500 MHz, DMSO- $d_6$ ) of F6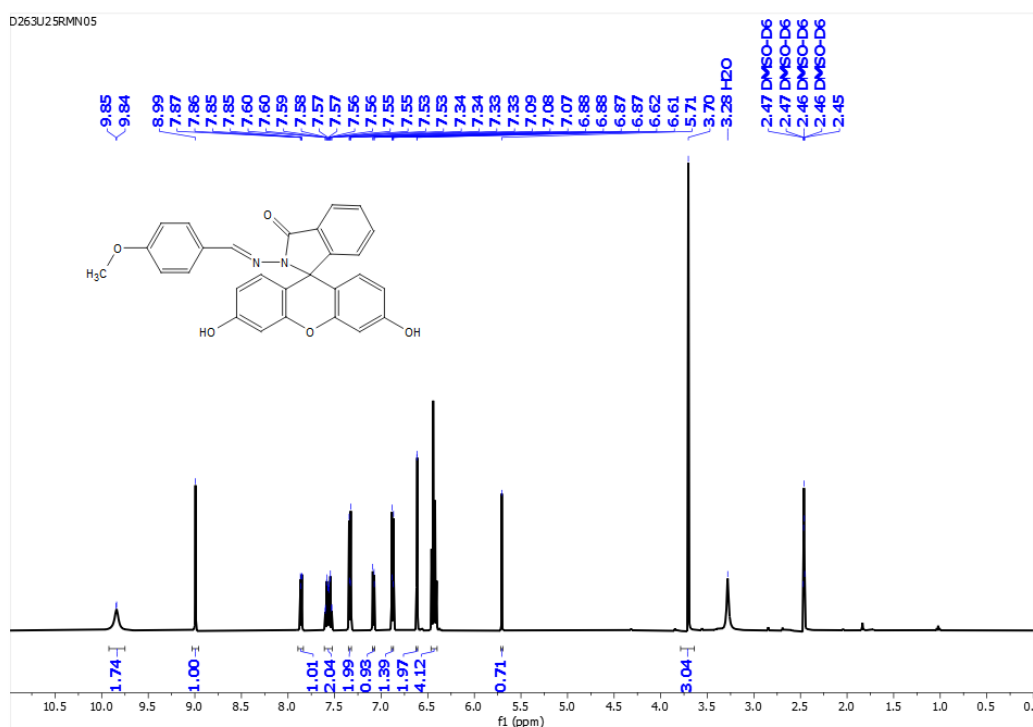Figure S 8.  $^1\text{H}$  NMR spectrum (500 MHz, DMSO- $d_6$ ) of F7

### III. NMR $^{13}\text{C}$ Spectra of FH, F1-F7

F7.2.fid

Spectre 13C de F7 (DMSO) EL YAZIDI

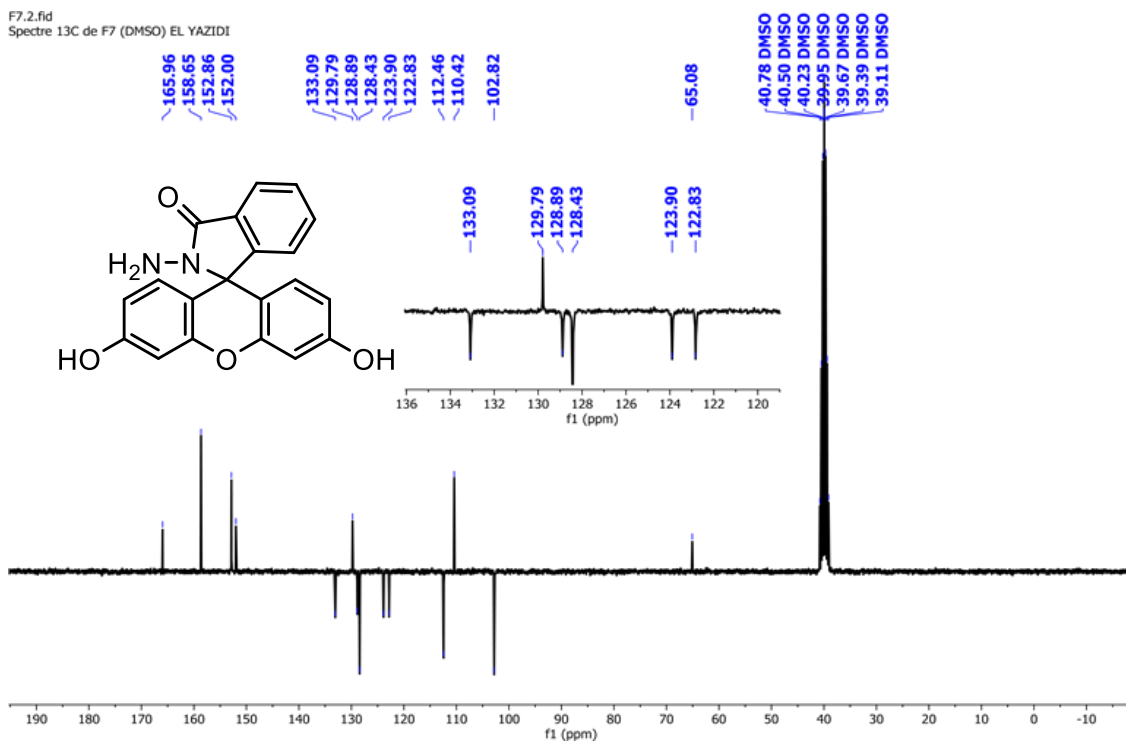

Figure S 9.  $^{13}\text{C}$  NMR spectrum (300 MHz, DMSO-d<sub>6</sub>) of FH

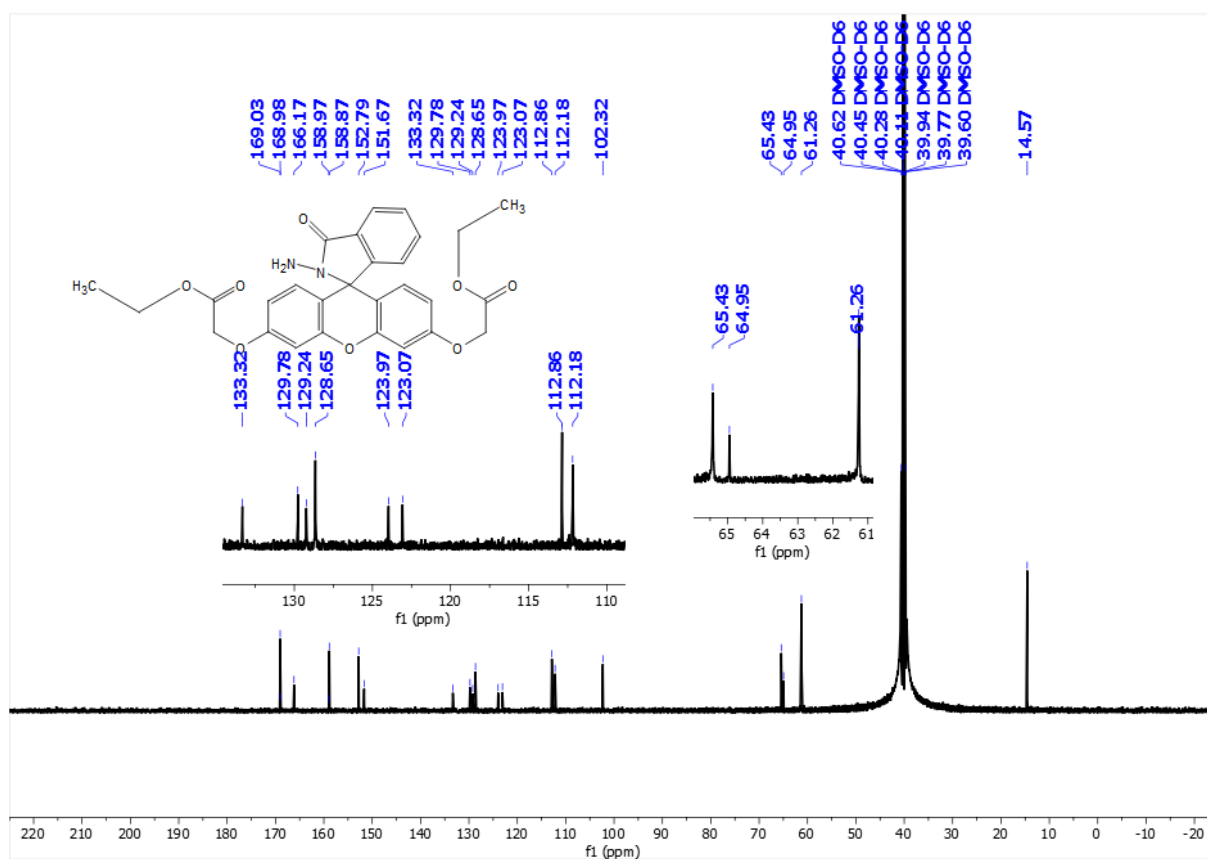

Figure S 10.  $^{13}\text{C}$  NMR spectrum (300 MHz, DMSO-d<sub>6</sub>) of F1

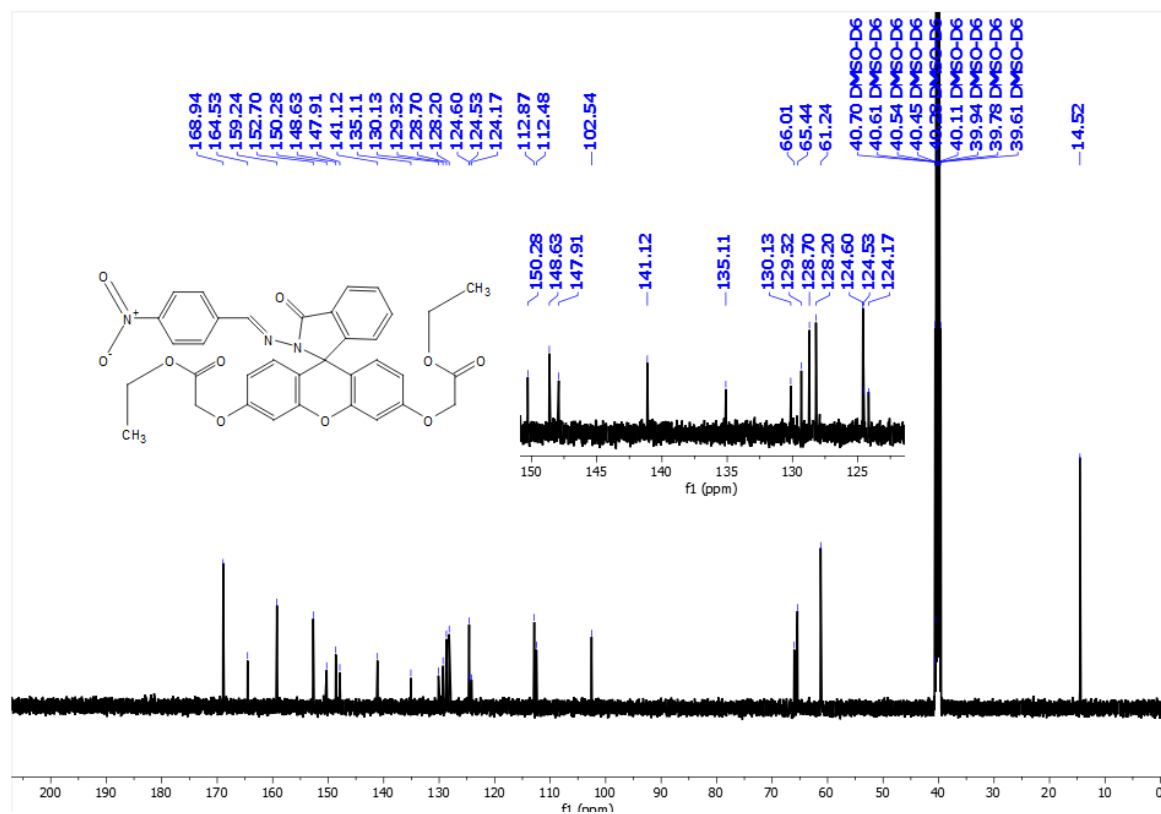

Figure S 11.  $^{13}\text{C}$  NMR spectrum (300 MHz, DMSO-d<sub>6</sub>) of F2

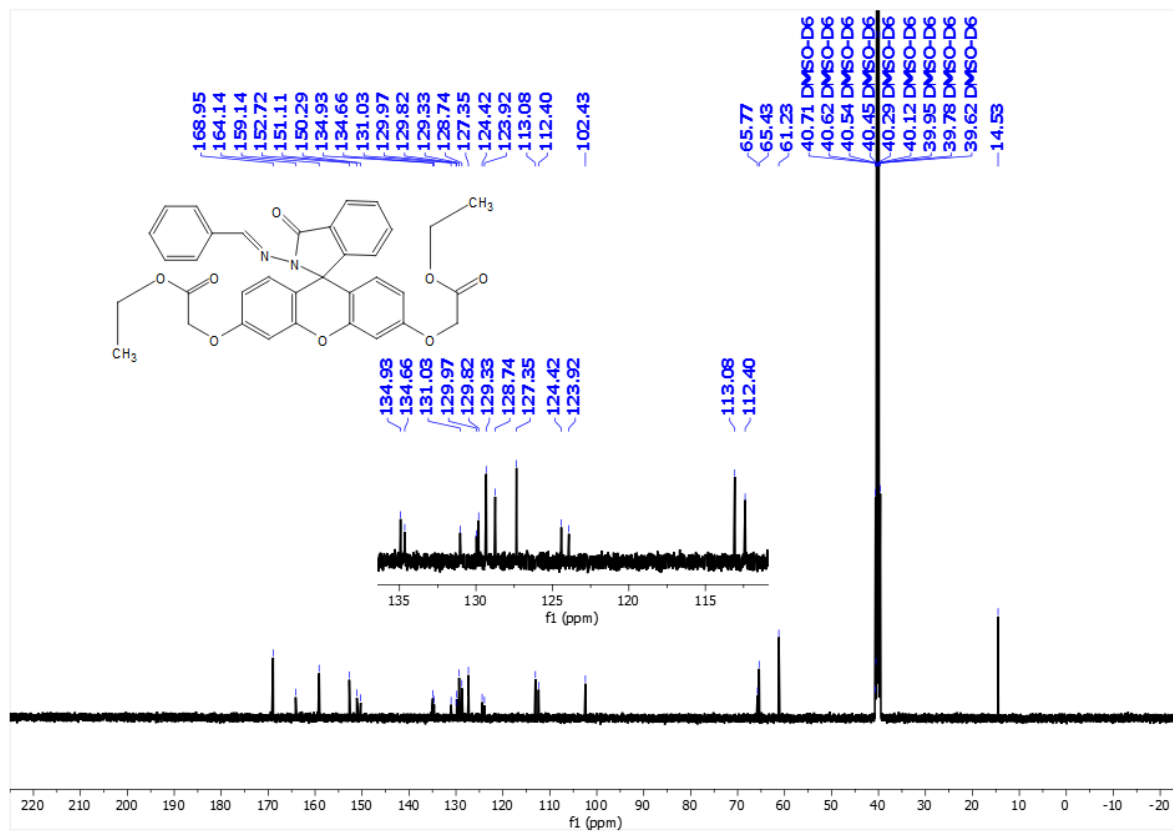

Figure S 12.  $^{13}\text{C}$  NMR spectrum (125 MHz, DMSO-d<sub>6</sub>) of F3

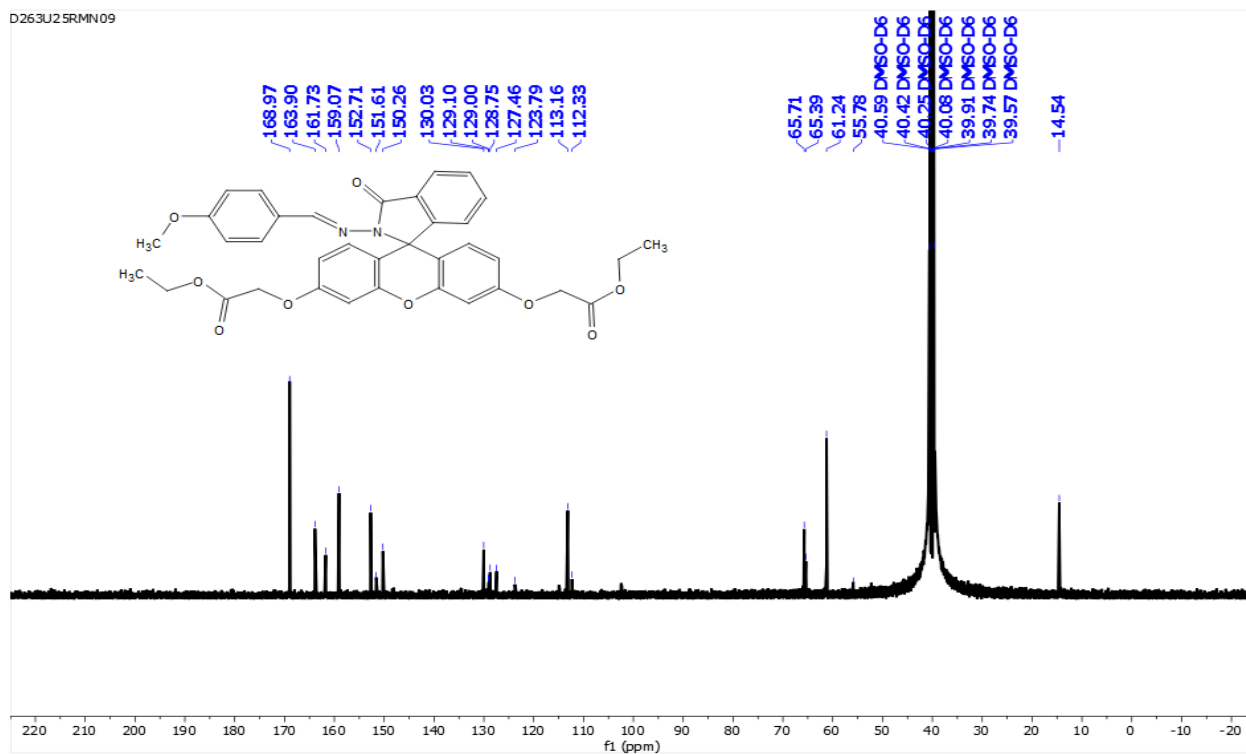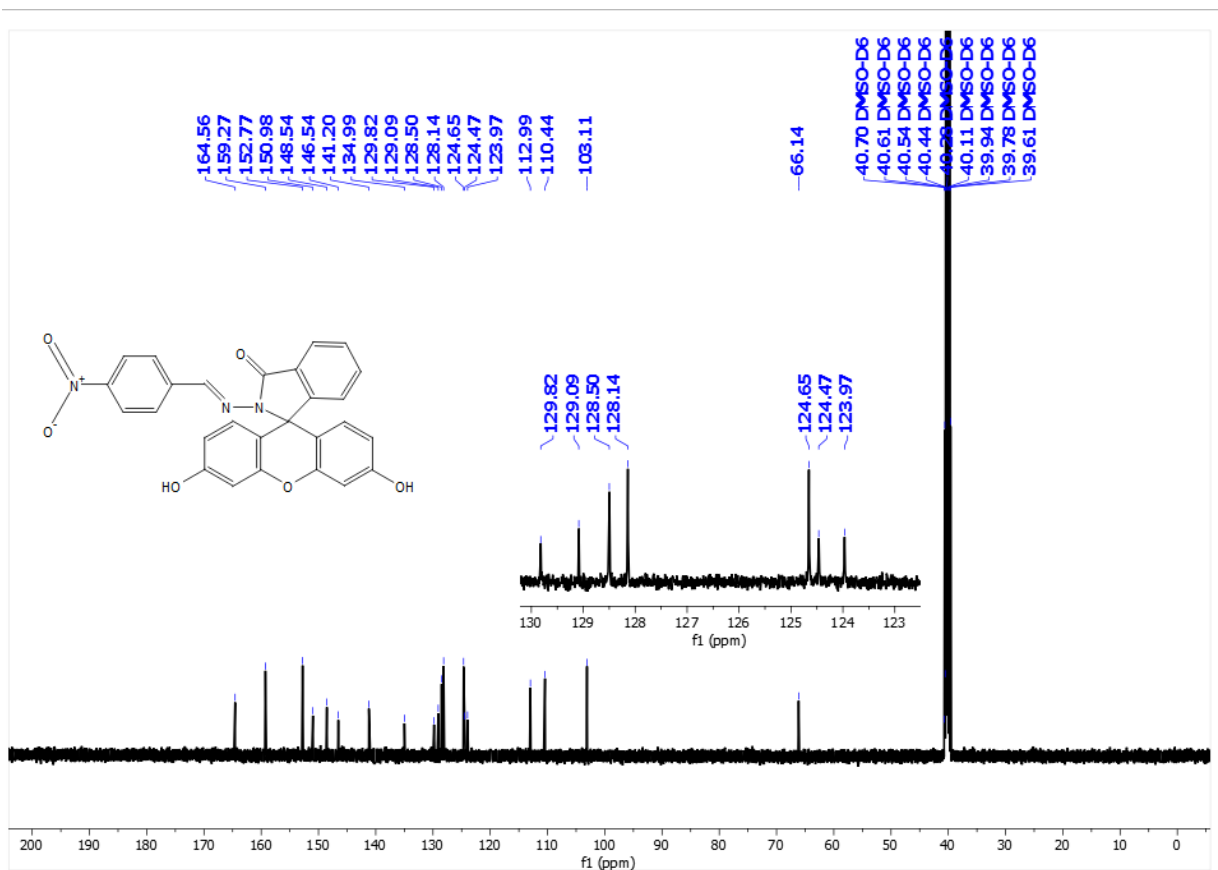

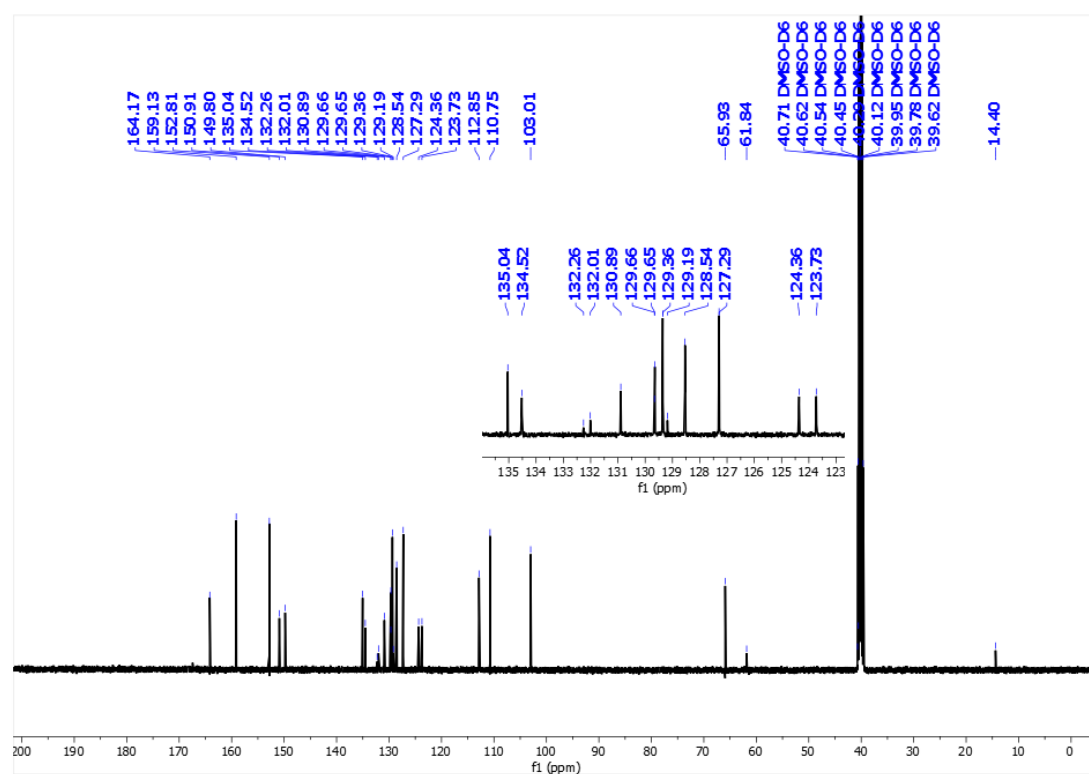

Figure S 15.  $^{13}\text{C}$  NMR spectrum (125 MHz, DMSO-d<sub>6</sub>) of F6

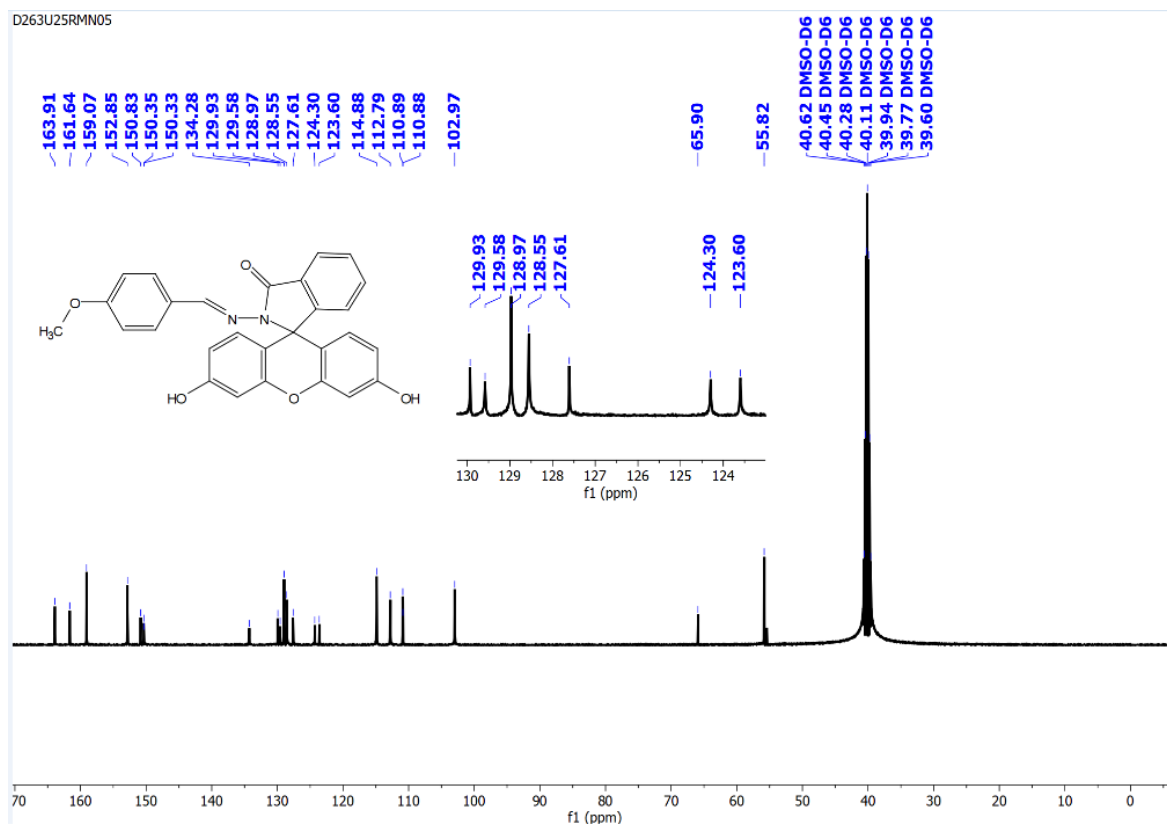

Figure S 16.  $^{13}\text{C}$  NMR spectrum (125 MHz, DMSO-d<sub>6</sub>) of F7

## IV. HRMS spectra

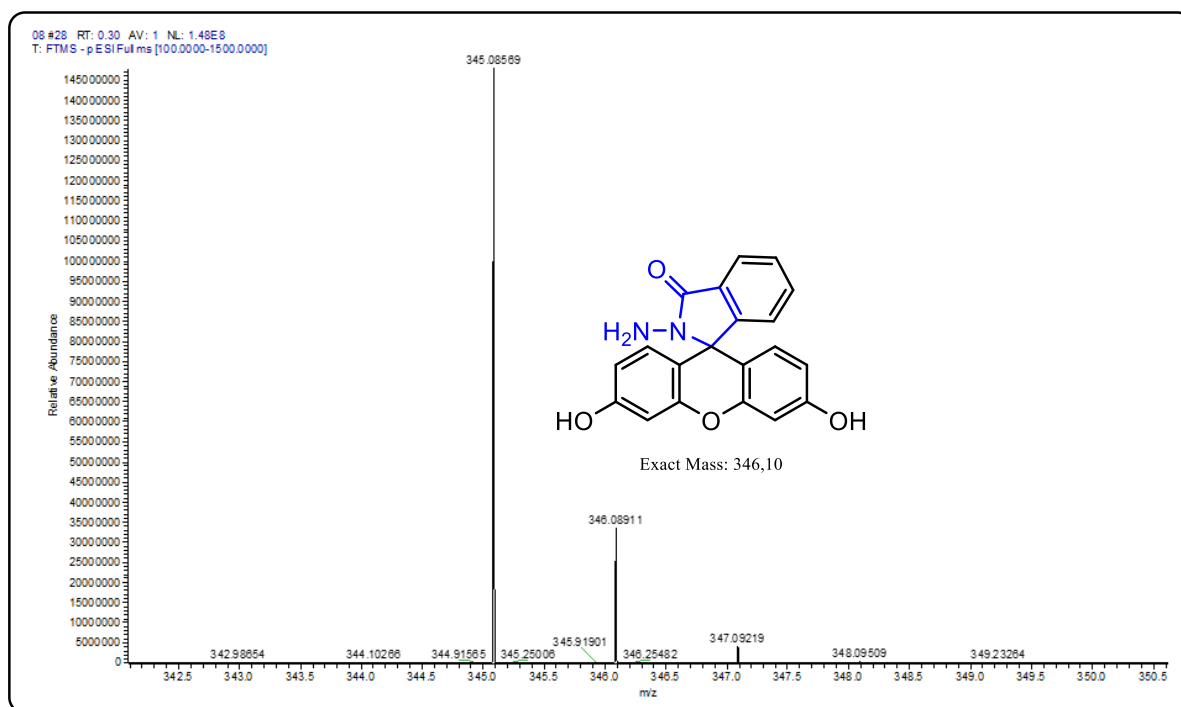

Figure S 17. Mass spectrum of FH

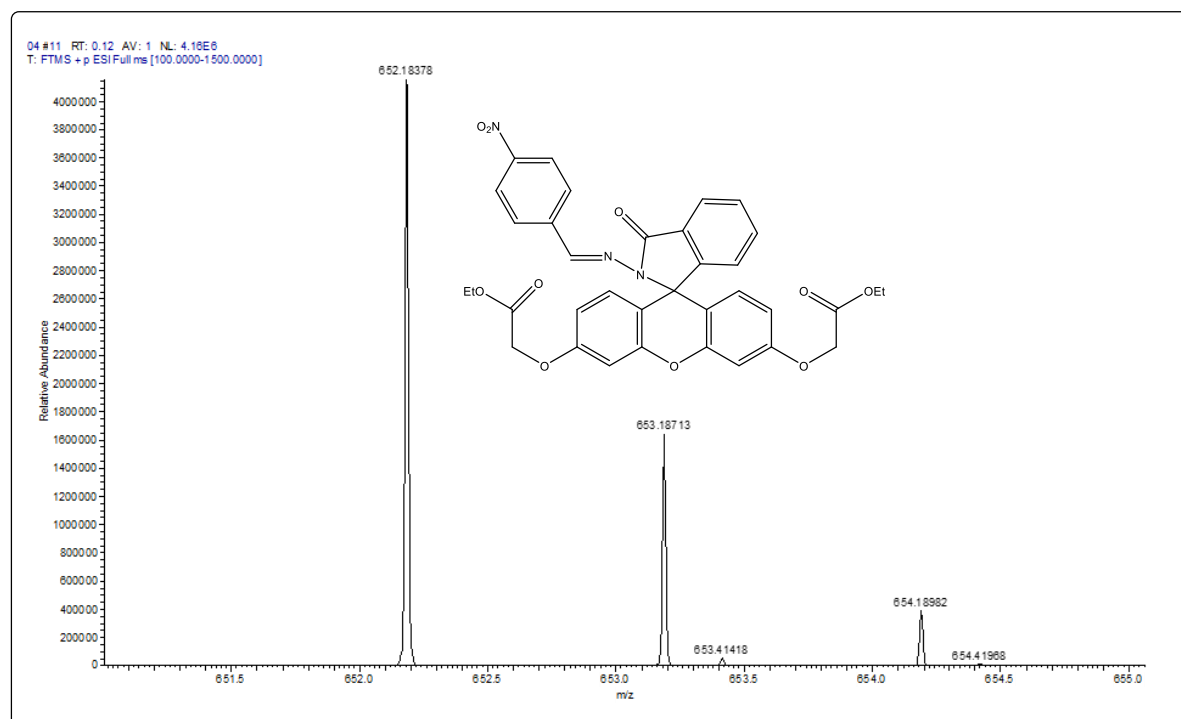

Figure S 18. Mass Spectrum of F2

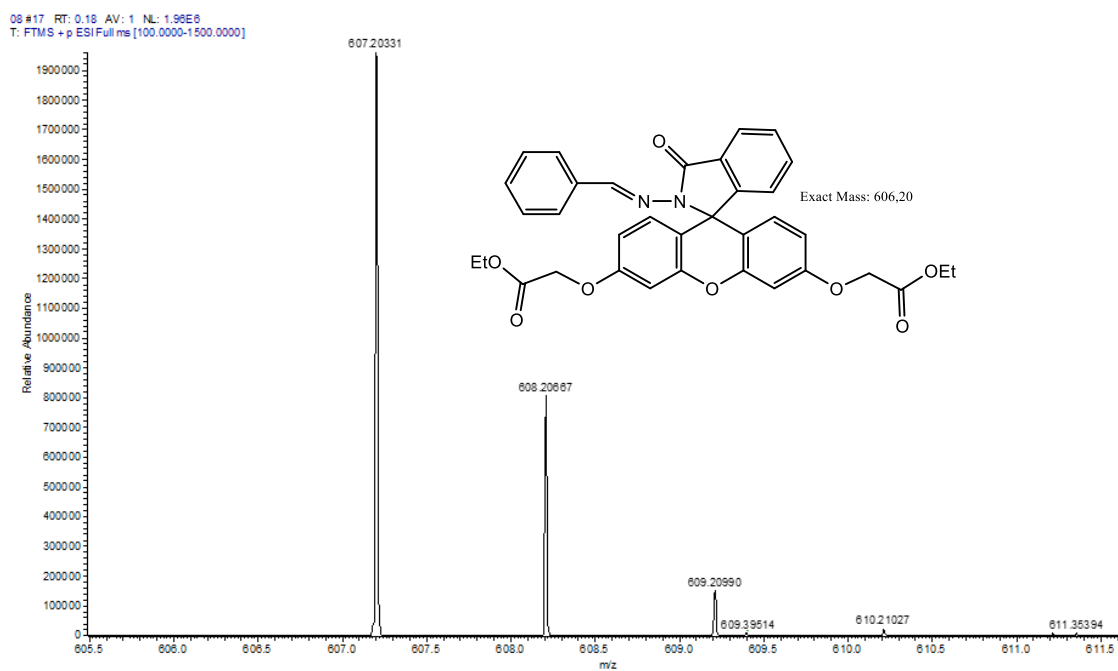

Figure S 19. Mass Spectrum of F3

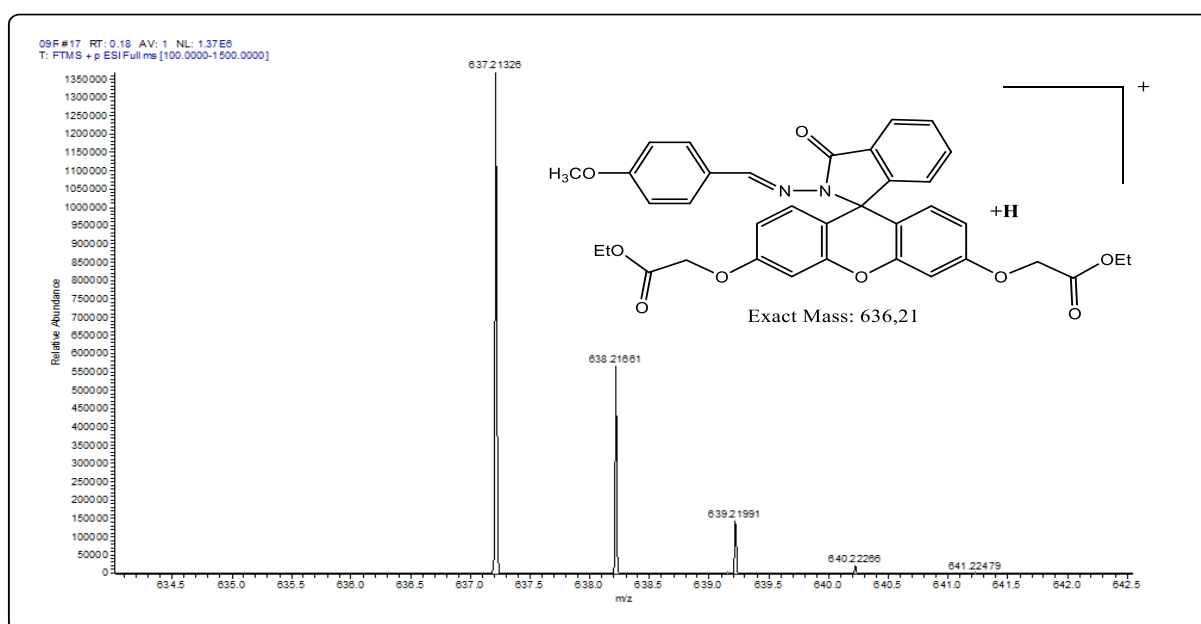

Figure S 20. Mass Spectrum of F4

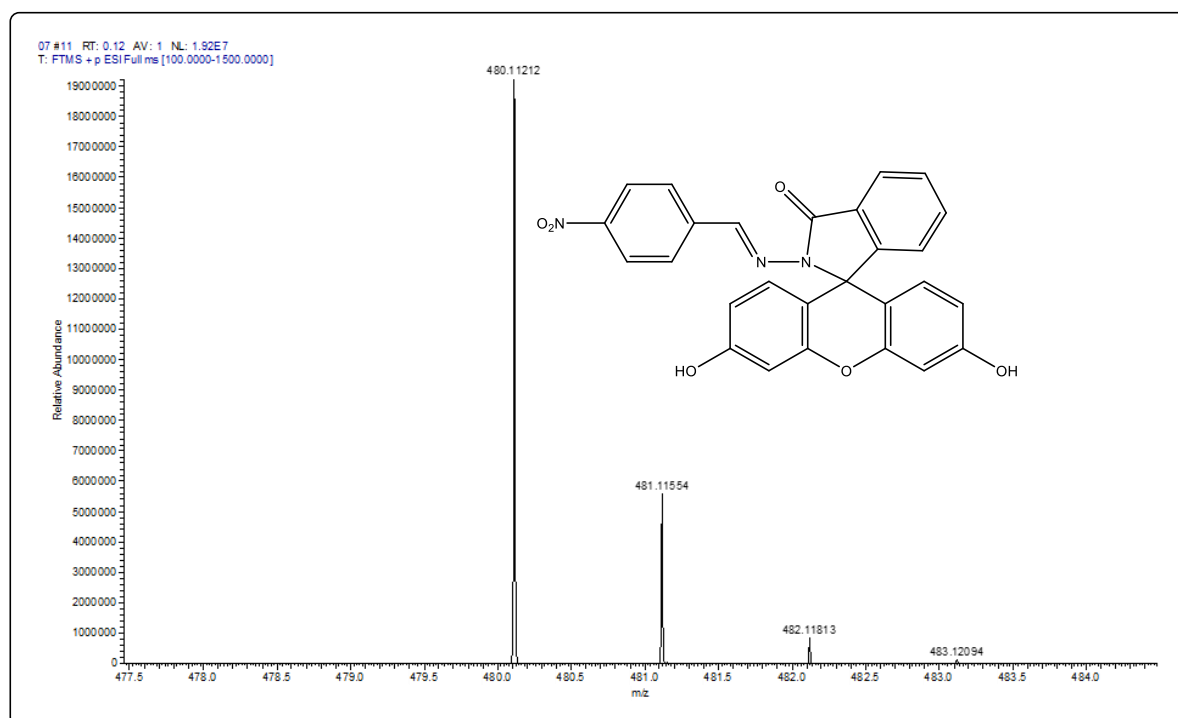**Figure S 21. Mass Spectrum of F5**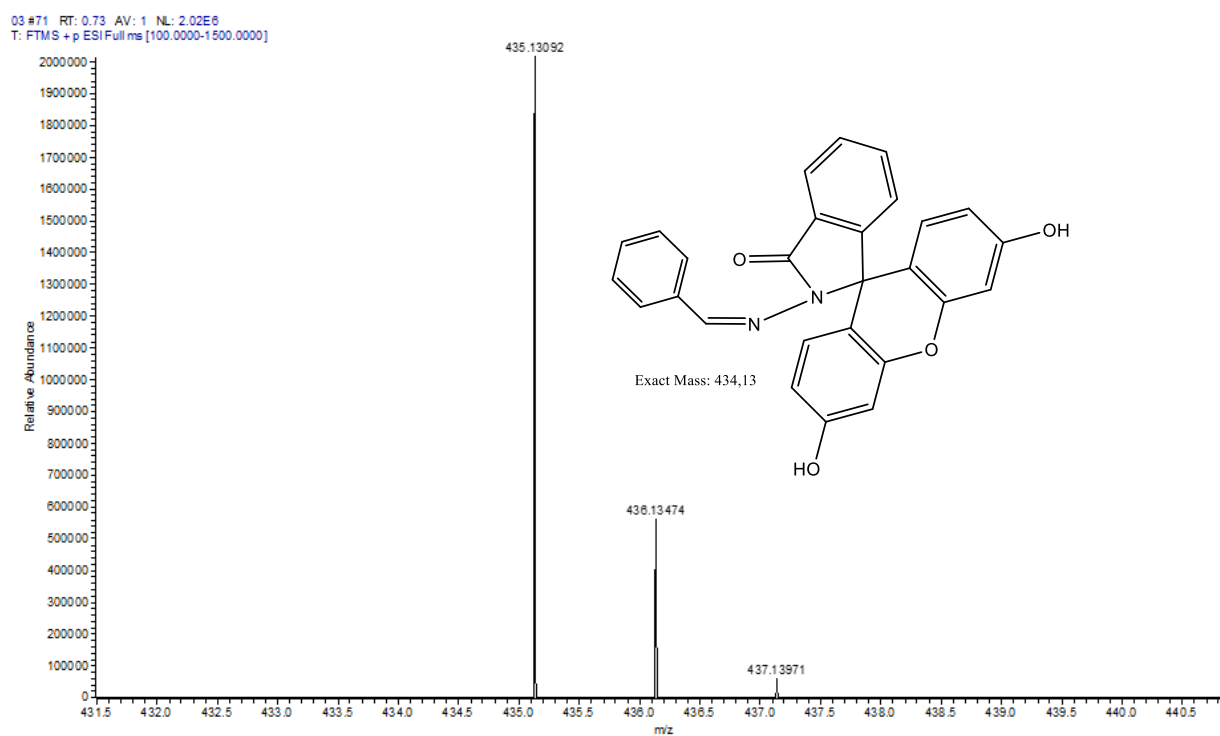**Figure S 22. Mass Spectrum of F6**

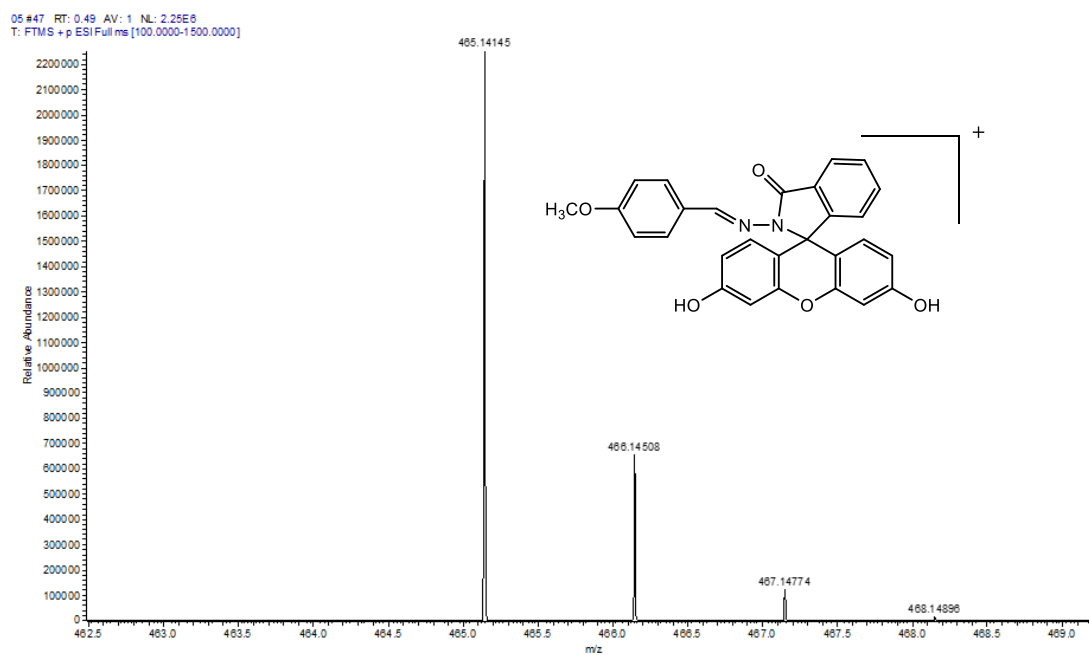

Figure S 23. Mass Spectrum of F7
